# Supplementary material
Source: PubMed Central journal article supplement (PMC5710534)
Supplement: jamaneurol-74-773-s001.pdf [file jamaneurol-74-773-s001.pdf]

## Supplementary Online Content

Hoffman EM, Watson JC, St Sauver J, Staff NP, Klein CJ. Association of long-term opioid therapy with functional status, adverse outcomes, and mortality among patients with polyneuropathy. *JAMA Neurol*. Published online May 22, 2017. doi:10.1001/jamaneurol.2017.0486

**eTable 1.** *ICD-9-CM* Codes Used to Assess Morbidity

**eTable 2.** Prescribing Indication and Provider for Chronic Opioid Therapy

This supplementary material has been provided by the authors to give readers additional information about their work.

**eTable 1. ICD-9-CM Codes Used to Assess Morbidity**

| Surrogate marker of comorbidity | ICD-9-CM codes                                                                                                                        |
|---------------------------------|---------------------------------------------------------------------------------------------------------------------------------------|
| Alcohol abuse                   | 305.01-305.03                                                                                                                         |
| Chemical dependence             | 303.91-303.93, 304.11-304.13, 304.21-304.23, 304.31-304.33, 304.51-304.53, 304.61-304.63, 304.81-304.83, 304.91-304.93, 648.31-648.34 |
| Depression                      | 290.13, 290.21, 290.43, 296.21-296.26, 296.31-296.36, 296.51-296.56, 296.82, 298, 301.12, 309.1, 309.28, 311                          |
| Opioid abuse                    | 305.51-305.53                                                                                                                         |
| Opioid dependence               | 304.01-304.03, 304.71-304.73                                                                                                          |
| Opioid overdose                 | 965.01-965.02, 965.09                                                                                                                 |
| Other overdose                  | 965.1, 965.4, 965.5, 965.61, 965.69, 965.7-965.9, 966.1-966.4, 967.1-967.6, 967.8-967.9, 969.8-969.9, 970.1                           |
| Substance abuse                 | 305.21-305.23, 305.31-305.33, 305.41-305.43, 305.61-305.63, 305.71-305.73, 305.81-305.83, 305.91-305.93                               |

**eTable 2.** Prescribing Indication and Provider for Chronic Opioid Therapy

| Indication for COT*                          | N (%)    |
|----------------------------------------------|----------|
| Musculoskeletal pain                         | 282 (53) |
| Polyneuropathy                               | 129 (24) |
| Radicular pain                               | 49 (9)   |
| Palliative                                   | 18 (3)   |
| Cranial pain                                 | 18 (3)   |
| Abdominal pain                               | 13 (2)   |
| Other                                        | 12 (2)   |
| Post procedure pain                          | 8 (1)    |
| Herpes zoster                                | 6 (1)    |
| Restless leg syndrome                        | 2 (0.4)  |
| COT prescriber specialty*                    |          |
| Internal Medicine (including subspecialties) | 373 (69) |
| Family Medicine                              | 71 (13)  |
| Surgery (any subspecialty)                   | 37 (7)   |
| Pain Medicine                                | 20 (4)   |
| Neurology                                    | 6 (1)    |
| Emergency Medicine/Urgent Care               | 6 (1)    |

\*Denominator = 537
